# Supplementary material
Source: Springer Nature journal article supplement (https://www.springermedizin.de/resource/supplementary/12882_2011_286_MOESM1_ESM.pdf/9453648)

**a)**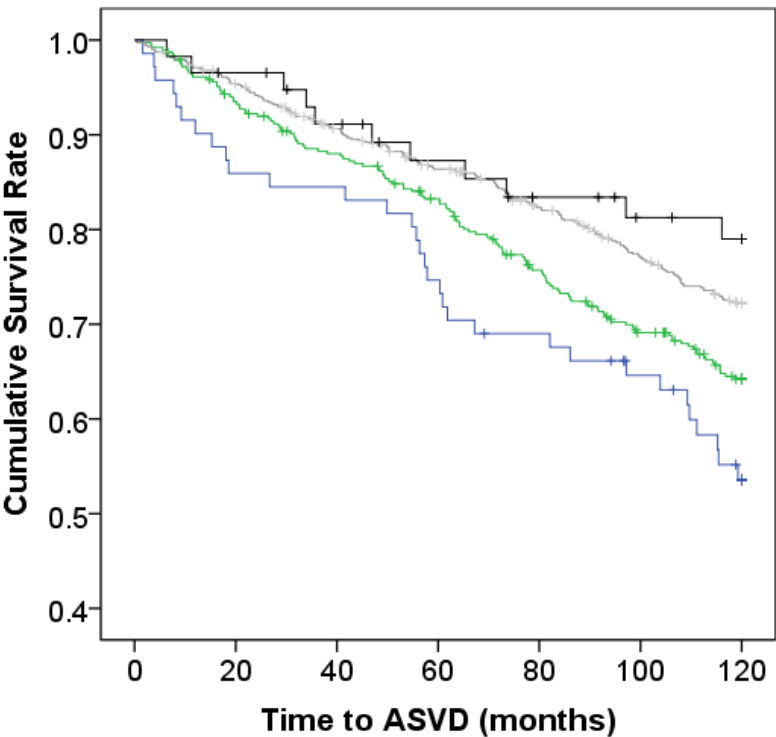**b)**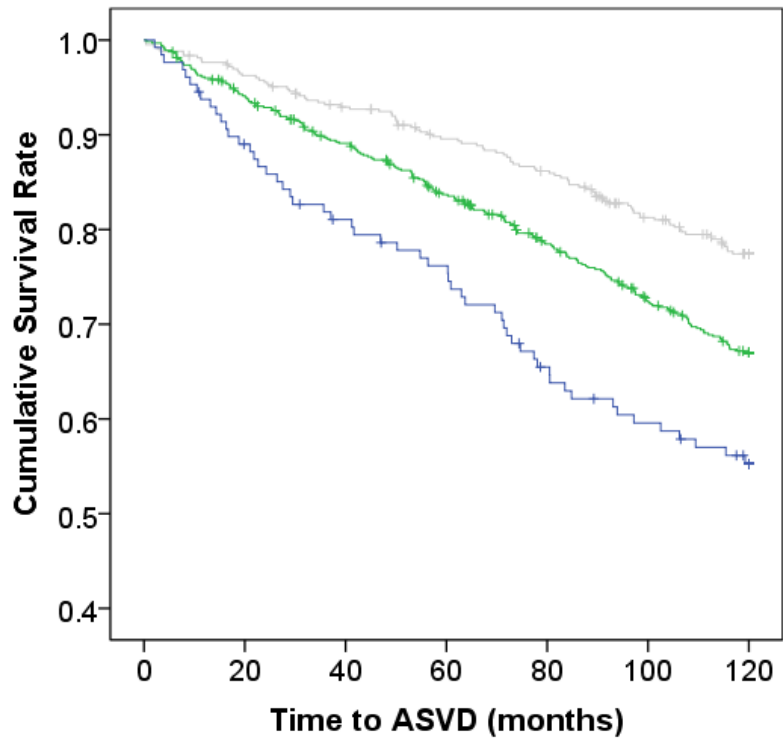

Supplement: MOESM1 [file 9453648]
